# Supplementary material
Source: PubMed Central journal article supplement (PMC33187)
Supplement: pnas_98_9_5199__1.pdf [file pnas_98_9_5199__1.pdf]

**Table 3. Origin of individuals genotyped**

| Continent of origin | Population                                                                                                       | <i>CCR5</i> | <i>RANTES</i> | <i>MIP-1<math>\alpha</math></i> |
|---------------------|------------------------------------------------------------------------------------------------------------------|-------------|---------------|---------------------------------|
| Africa              | Pygmy                                                                                                            | 36          | 40            |                                 |
|                     | Non-Pygmy                                                                                                        | 107         | 174           |                                 |
|                     | African American †                                                                                               | 646         | 649           | 652                             |
| Europe              | Finland, France, Poland                                                                                          | 138         |               |                                 |
|                     | European American †                                                                                              | 821         | 1,001         | 1,006                           |
| Latin America       | Hispanic American †                                                                                              | 86          | 68            | 126                             |
|                     | Argentina †                                                                                                      | 751         |               |                                 |
| Asia: India         | Brahmin, Chenchu, Irula, Khonda Dora, Kapu, Madiga, Maria Gond, Mala, Nicobarese, Paniyan, Relli, Yadava, Yanadi | 224         | 338           |                                 |
| Asia: Non-Indian    | China, Cambodia, Indonesia, Japan, Korea, Malaysia, Mongolia, Muar, Philippines, Siberia, Taiwan, Tibet, Vietnam | 234         | 238           |                                 |

† Combined data for individuals who are HIV-positive or HIV-negative.
