# Supplementary material
Source: PubMed Central journal article supplement (PMC33187)

**a**RANTES -471A>G

5' -GGTAGCCAATAATGATAGAGTATGCTG-3' SENSE

5' -TCACTGAGTCTTCAAAGTTCCTGCTTATTCATTACAGATCGTA-3' ANTISENSE

A restriction enzyme site for *Rsa* I is created by changing the sequence at position 41 (T>G) in the antisense primer. The PCR amplicon is digested when it contains -471G.

RANTES -96C>G

5' -CCTATGACCAGGATGAAAGCAAGAAATTCC-3' SENSE

5' -AGGTCCACGTGCTGTCTTGATCCTCTGCAGCTCAGGCTGGCCCTTTATAGGGCCAATT-3' ANTISENSE

A restriction enzyme site for *Mfe* I is created by changing the sequence at position 56 (G>A) in the antisense primer. The PCR amplicon is digested when it contains -96C.

MIP-1 $\alpha$  +113C>T

5' -CACGTGAGTCTGAGTTTC-3' SENSE

5' -GTTCTCTTATCTCAGTTC-3' ANTISENSE

+113C creates a natural restriction enzyme site for *Msc* I.

MIP-1 $\alpha$  +459C>T

5' -CACGTGAGTCTGAGTTTC-3' SENSE

5' -GTCTGGTTCAAGAAGTCATACCCCAACCCAAGAGAG-3' ANTISENSE

A restriction enzyme site for *Stu* I is created by changing the sequence at position 36 (A>G) in the antisense primer. The PCR amplicon is digested when it contains +459C.

**b**

| Gene               | SNP      | PCR conditions     |              |            |                        | Digestion conditions |              |           |        |
|--------------------|----------|--------------------|--------------|------------|------------------------|----------------------|--------------|-----------|--------|
|                    |          | Anneling temp (°C) | Total cycles | Cycle type | MgCl <sub>2</sub> (mM) | Temp (°C)            | Enzyme       | Units/PCR | Time   |
| <i>RANTES</i>      | -471 A>G | 65                 | 60           | (5+55)     | 3                      | 37                   | <i>Rsa</i> I | 10        | 1 day  |
|                    | -96 C>G  | 55                 | 60           | (5+55)     | 3                      | 37                   | <i>Mfe</i> I | 10        | 3 days |
| <i>MIP-1 alpha</i> | +113 C>T | 55                 | 55           | (5+55)     | 3                      | 37                   | <i>Msc</i> I | 10        | 3 days |
|                    | +459 C>T | 55                 | 55           | (5+55)     | 3                      | 37                   | <i>Stu</i> I | 10        | 3 days |

**c**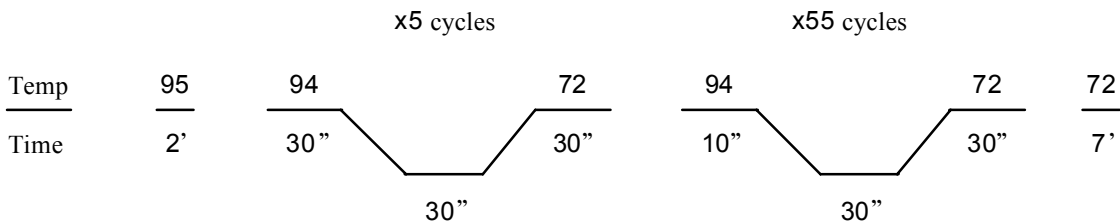

Supplement: pnas_98_9_5199__4.pdf [file pnas_98_9_5199__4.pdf]
