# Supplementary material
Source: PubMed Central journal article supplement (PMC33187)
Supplement: pnas_98_9_5199__6.pdf [file pnas_98_9_5199__6.pdf]

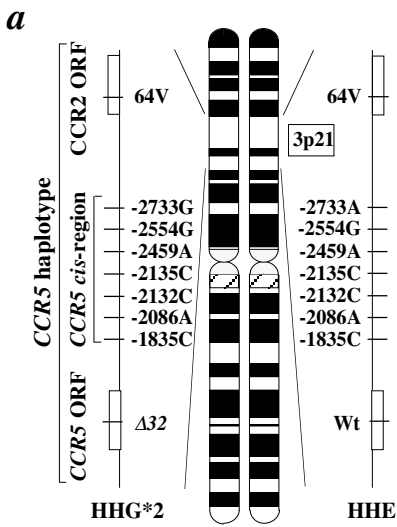

**b**

| HH    | CCR2       | CCR5                       |          |          |          |          |          |          | ORF        |  |
|-------|------------|----------------------------|----------|----------|----------|----------|----------|----------|------------|--|
|       |            | CCR5 cis-regulatory region |          |          |          |          |          |          |            |  |
|       |            | #                          |          |          |          |          |          |          |            |  |
|       |            | 1                          | A29G     | G208T    | G303A    | T627C    | C630T    | A676G    | C927T      |  |
|       | V64I       | 2                          | 58755    | 58934    | 59029    | 59353    | 59356    | 59402    | 59653      |  |
|       |            | 3                          | -2733    | -2554    | -2459    | -2135    | -2132    | -2086    | -1835      |  |
| HHA   | 64V        | A                          | G        | G        | T        | C        | A        | C        | Wt         |  |
| HHB   | 64V        | A                          | <b>T</b> | G        | T        | C        | A        | C        | Wt         |  |
| HHC   | 64V        | A                          | <b>T</b> | G        | T        | C        | <b>G</b> | C        | Wt         |  |
| HHD   | 64V        | A                          | <b>T</b> | G        | T        | <b>T</b> | A        | C        | Wt         |  |
| HHE   | 64V        | A                          | G        | <b>A</b> | <b>C</b> | C        | A        | C        | Wt         |  |
| HHF*1 | 64V        | A                          | G        | <b>A</b> | <b>C</b> | C        | A        | <b>T</b> | Wt         |  |
| HHF*2 | <b>64I</b> | A                          | G        | <b>A</b> | <b>C</b> | C        | A        | <b>T</b> | Wt         |  |
| HHG*1 | 64V        | <b>G</b>                   | G        | <b>A</b> | <b>C</b> | C        | A        | C        | Wt         |  |
| HHG*2 | 64V        | <b>G</b>                   | G        | <b>A</b> | <b>C</b> | C        | A        | C        | <b>Δ32</b> |  |
