# Supplementary material
Source: PubMed Central journal article supplement (PMC33187)
Supplement: pnas_98_9_5199__7.pdf [file pnas_98_9_5199__7.pdf]

**Table 4. Number and frequency of individuals with *RANTES* SNPs**

| SNP   | European American |       |          |       | African American |       |          |       | Hispanic American |       |
|-------|-------------------|-------|----------|-------|------------------|-------|----------|-------|-------------------|-------|
|       | Control           |       | HIV-1+   |       | Control          |       | HIV-1+   |       | HIV-1+            |       |
|       | <i>n</i>          | %     | <i>n</i> | %     | <i>n</i>         | %     | <i>n</i> | %     | <i>n</i>          | %     |
| -471  |                   |       |          |       |                  |       |          |       |                   |       |
| A/A   | 16                | 4.2   | 23       | 3.7   | 33               | 13.4  | 68       | 16.9  | 6                 | 8.8   |
| A/G   | 103               | 26.9  | 195      | 31.6  | 136              | 55.3  | 184      | 45.7  | 20                | 29.4  |
| G/G   | 264               | 68.9  | 400      | 64.7  | 77               | 31.3  | 151      | 37.5  | 42                | 61.8  |
| -96   |                   |       |          |       |                  |       |          |       |                   |       |
| C/C   | 376               | 98.2  | 595      | 96.3  | 245              | 99.6  | 397      | 98.5  | 67                | 98.5  |
| C/G   | 7                 | 1.8   | 23       | 3.7   | 1                | 0.4   | 6        | 1.5   | 1                 | 1.5   |
| G/G   | 0                 | 0.0   | 0        | 0.0   | 0                | 0.0   | 0        | 0.0   | 0                 | 0.0   |
| Total | 383               | 100.0 | 618      | 100.0 | 246              | 100.0 | 403      | 100.0 | 68                | 100.0 |

*n*, absolute number of patients (HIV+) or blood donors (Control); %, frequency.
