# Supplementary material
Source: PubMed Central journal article supplement (PMC33187)
Supplement: pnas_98_9_5199__9.pdf [file pnas_98_9_5199__9.pdf]

**Table 6. *MIP-1α*+113T is in complete linkage with *MIP-1α*+459T.**

| +459 | +113  |     |     |
|------|-------|-----|-----|
|      | C/C   | C/T | T/T |
| C/C  | 1,149 | 0   | 0   |
| C/T  | 476   | 95  | 0   |
| T/T  | 55    | 6   | 3   |

All individuals homozygous for *MIP-1α*+113T are also homozygous for *MIP-1α*+459T, and all individuals heterozygous for *MIP-1α*+113T are homozygous or heterozygous for *MIP-1α*+459T. This suggests that *MIP-1α*+113T mutation occurred in the context of a mutated *MIP-1α*+459T allele. Thus, this linkage pattern along with the sequencing data identified three different haplotypes designated CC, CT, and TT. Data is for the combined analysis of U.S.-based HIV+ individuals and control blood donors.
