# Supplementary material
Source: PubMed Central journal article supplement (PMC33187)
Supplement: pnas_98_9_5199__10.pdf [file pnas_98_9_5199__10.pdf]

**Table 7. Number and frequency of individuals with *MIP-1 $\alpha$*  SNPs**

| SNP          | European American |              |            |              | African American |              |            |              | Hispanic American |              |           |              |
|--------------|-------------------|--------------|------------|--------------|------------------|--------------|------------|--------------|-------------------|--------------|-----------|--------------|
|              | Control           |              | HIV-1+     |              | Control          |              | HIV-1+     |              | Control           |              | HIV-1+    |              |
|              | <i>n</i>          | %            | <i>n</i>   | %            | <i>n</i>         | %            | <i>n</i>   | %            | <i>n</i>          | %            | <i>n</i>  | %            |
| +113         |                   |              |            |              |                  |              |            |              |                   |              |           |              |
| C/C          | 385               | 100.0        | 611        | 98.4         | 204              | 81.9         | 359        | 89.1         | 57                | 98.3         | 64        | 94.1         |
| C/T          | 0                 | 0.0          | 9          | 1.4          | 45               | 18.1         | 42         | 10.4         | 1                 | 1.7          | 4         | 5.9          |
| T/T          | 0                 | 0.0          | 1          | 0.2          | 0                | 0.0          | 2          | 0.5          | 0                 | 0.0          | 0         | 0.0          |
| +459         |                   |              |            |              |                  |              |            |              |                   |              |           |              |
| C/C          | 217               | 56.4         | 365        | 58.8         | 182              | 73.1         | 307        | 76.2         | 40                | 69.0         | 38        | 55.9         |
| C/T          | 151               | 39.2         | 223        | 35.9         | 64               | 25.7         | 88         | 21.8         | 16                | 27.6         | 29        | 42.6         |
| T/T          | 17                | 4.4          | 33         | 5.3          | 3                | 1.2          | 8          | 2.0          | 2                 | 3.4          | 1         | 1.5          |
| <b>Total</b> | <b>385</b>        | <b>100.0</b> | <b>621</b> | <b>100.0</b> | <b>249</b>       | <b>100.0</b> | <b>403</b> | <b>100.0</b> | <b>58</b>         | <b>100.0</b> | <b>68</b> | <b>100.0</b> |

*n*, absolute number of patients (HIV+) or blood donors (Control); %, frequency.
