# Supplementary material
Source: PubMed Central journal article supplement (PMC33187)
Supplement: pnas_98_9_5199__11.pdf [file pnas_98_9_5199__11.pdf]

**Table 8. Distribution of CCR5 haplotype pairs in different ethnic populations.**

| CCR5<br>HAPLOTYPE<br>PAIR |     | ORIGIN  |                        |                                    |                        |                                     |                         |            |       |
|---------------------------|-----|---------|------------------------|------------------------------------|------------------------|-------------------------------------|-------------------------|------------|-------|
|                           |     | AFRICAN |                        | AFRICAN-<br>AMERICAN <sup>††</sup> | EUROPEAN <sup>††</sup> | HISPANIC-<br>AMERICAN <sup>††</sup> | ARGENTINA <sup>††</sup> | ASIAN      |       |
|                           |     | PYGMY   | NON-PYGMY <sup>†</sup> |                                    |                        |                                     |                         | NON-INDIAN | INDIA |
| A                         | A   | 18      | 1                      | 30                                 | 9                      | 1                                   | 3                       |            | 9     |
| A                         | B   | 1       | 1                      | 2                                  | 2                      |                                     |                         |            | 1     |
| A                         | C   | 1       | 6                      | 33                                 | 69                     | 6                                   | 38                      | 7          | 22    |
| A                         | D   |         | 6                      | 56                                 |                        |                                     |                         |            | 3     |
| A                         | E   | 5       | 13                     | 50                                 | 58                     | 6                                   | 22                      | 6          | 24    |
| A                         | F*1 | 4       | 3                      | 11                                 |                        |                                     | 6                       |            | 3     |
| A                         | F*2 | 4       | 16                     | 39                                 | 19                     |                                     | 17                      | 8          | 10    |
| A                         | G*1 |         | 4                      | 14                                 | 3                      | 1                                   | 4                       |            |       |
| A                         | G*2 |         |                        | 7                                  | 19                     |                                     | 4                       | 1          |       |
| B                         | C   |         | 1                      | 3                                  | 2                      |                                     | 3                       |            |       |
| B                         | D   |         | 6                      | 1                                  |                        |                                     |                         |            |       |
| B                         | E   | 1       | 3                      | 3                                  | 3                      |                                     | 2                       |            |       |
| B                         | F*2 |         |                        | 1                                  |                        |                                     |                         |            | 1     |
| B                         | G*2 |         |                        |                                    | 1                      |                                     |                         |            |       |
| C                         | C   |         |                        | 15                                 | 112                    | 12                                  | 88                      | 48         | 32    |
| C                         | D   |         | 1                      | 33                                 | 3                      | 2                                   | 4                       |            |       |
| C                         | E   |         | 5                      | 38                                 | 224                    | 12                                  | 172                     | 51         | 52    |
| C                         | F*1 |         | 3                      | 16                                 | 9                      | 3                                   | 18                      | 2          | 3     |
| C                         | F*2 |         | 3                      | 21                                 | 56                     | 10                                  | 71                      | 39         | 19    |
| C                         | G*1 |         |                        | 8                                  | 24                     | 3                                   | 32                      | 1          | 1     |
| C                         | G*2 |         |                        | 6                                  | 65                     | 2                                   | 14                      | 1          |       |
| D                         | D   |         | 4                      | 28                                 | 2                      |                                     |                         |            |       |
| D                         | E   |         | 10                     | 45                                 | 4                      | 2                                   | 3                       |            | 1     |
| D                         | F*1 |         | 2                      | 9                                  |                        |                                     |                         |            |       |
| D                         | F*2 |         | 4                      | 39                                 | 1                      | 1                                   | 5                       |            | 2     |
| D                         | G*1 |         |                        | 11                                 |                        |                                     |                         |            |       |
| D                         | G*2 |         |                        | 2                                  |                        |                                     |                         |            |       |
| E                         | E   | 1       | 2                      | 21                                 | 104                    | 8                                   | 72                      | 15         | 19    |
| E                         | F*1 |         | 4                      | 8                                  | 7                      | 1                                   | 17                      | 4          | 2     |
| E                         | F*2 |         | 3                      | 31                                 | 43                     | 7                                   | 58                      | 23         | 11    |
| E                         | G*1 | 1       |                        | 11                                 | 22                     | 1                                   | 27                      |            | 1     |
| E                         | G*2 |         |                        | 12                                 | 52                     | 3                                   | 16                      | 2          | 1     |
| F*1                       | F*1 |         | 1                      |                                    | 2                      |                                     | 2                       | 3          |       |
| F*1                       | F*2 |         | 2                      | 9                                  | 2                      |                                     | 3                       | 3          |       |
| F*1                       | G*1 |         |                        | 3                                  | 1                      |                                     | 2                       |            |       |
| F*1                       | G*2 |         |                        |                                    |                        |                                     | 2                       |            |       |
| F*2                       | F*2 |         | 3                      | 20                                 | 8                      | 2                                   | 25                      | 18         | 6     |
| F*2                       | G*1 |         |                        | 6                                  | 13                     |                                     | 9                       |            | 1     |
| F*2                       | G*2 |         |                        | 3                                  | 8                      | 3                                   | 5                       | 2          |       |
| G*1                       | G*1 |         |                        |                                    | 1                      |                                     | 1                       |            |       |
| G*1                       | G*2 |         |                        |                                    | 9                      |                                     | 5                       |            |       |
| G*2                       | G*2 |         |                        | 1                                  | 2                      |                                     | 1                       |            |       |
| Total                     |     | 36      | 107                    | 646                                | 959                    | 86                                  | 751                     | 234        | 224   |

<sup>†</sup>, Non-pygmy sub-Saharan Africans.

<sup>††</sup>, Combined data for HIV+ and HIV- individuals
