# Supplementary material
Source: PubMed Central journal article supplement (PMC33187)
Supplement: pnas_98_9_5199__12.pdf [file pnas_98_9_5199__12.pdf]

**Table 9. Representative *CCR5* haplotypes/haplotype pairs that influence HIV-1 disease progression in an ethnically mixed U.S.-based cohort of infected individuals**

|                       | African | European | Hispanic |
|-----------------------|---------|----------|----------|
| <b>Haplotype</b>      |         |          |          |
| A                     | ▼       | ↔        | ND       |
| C                     | ▲       | ▼        | ▼        |
| E                     | ↔       | ↔        | ND       |
| F*2                   | ▼       | ↔        | ND       |
| <b>Haplotype Pair</b> |         |          |          |
| A/F*2                 | ▼       | ↔        | ND       |
| C/D                   | ▲       | ND       | ND       |
| C/G*2                 | ND      | ▼        | ND       |
| E/E                   | ↔       | ▲        | ND       |

▼, retardation      ▲, acceleration      ↔, no difference

ND, not determinable due to limited sample size, and/or events; data derived from ref. 1.
