# Supplementary material
Source: PubMed Central journal article supplement (PMC33187)
Supplement: pnas_98_9_5199__13.pdf [file pnas_98_9_5199__13.pdf]

**Table 10. *CCR5* haplotype pairs (HP) associated with altered risks of vertical transmission and disease progression in Argentinean children exposed perinatally to HIV-1**

| Transmission        | Risk      |           |            |
|---------------------|-----------|-----------|------------|
|                     | Decreased | Increased |            |
| HP                  | C/G*2     | C/E,      | E/E, E/G*2 |
| Disease Progression | Slower    | Faster    |            |
| HP                  | C/F*2     | C/E,      | E/E, E/G*2 |

Data derived from ref. 5.
